# Supplementary material for: New crystalline form of 7-amino-4-methylcoumarin (coumarin 120)—a polymorph with 1 ∶ 1 valence tautomers
Source: Royal Society of Chemistry journal article supplement (doi:10.1039/b707581b), 2007-01-01

sub to 1.63 mg

Sample: C 120 2PR

Method: DSC

DSC File: A:DSC.015

Run Date: 21-Jun-07 11:30

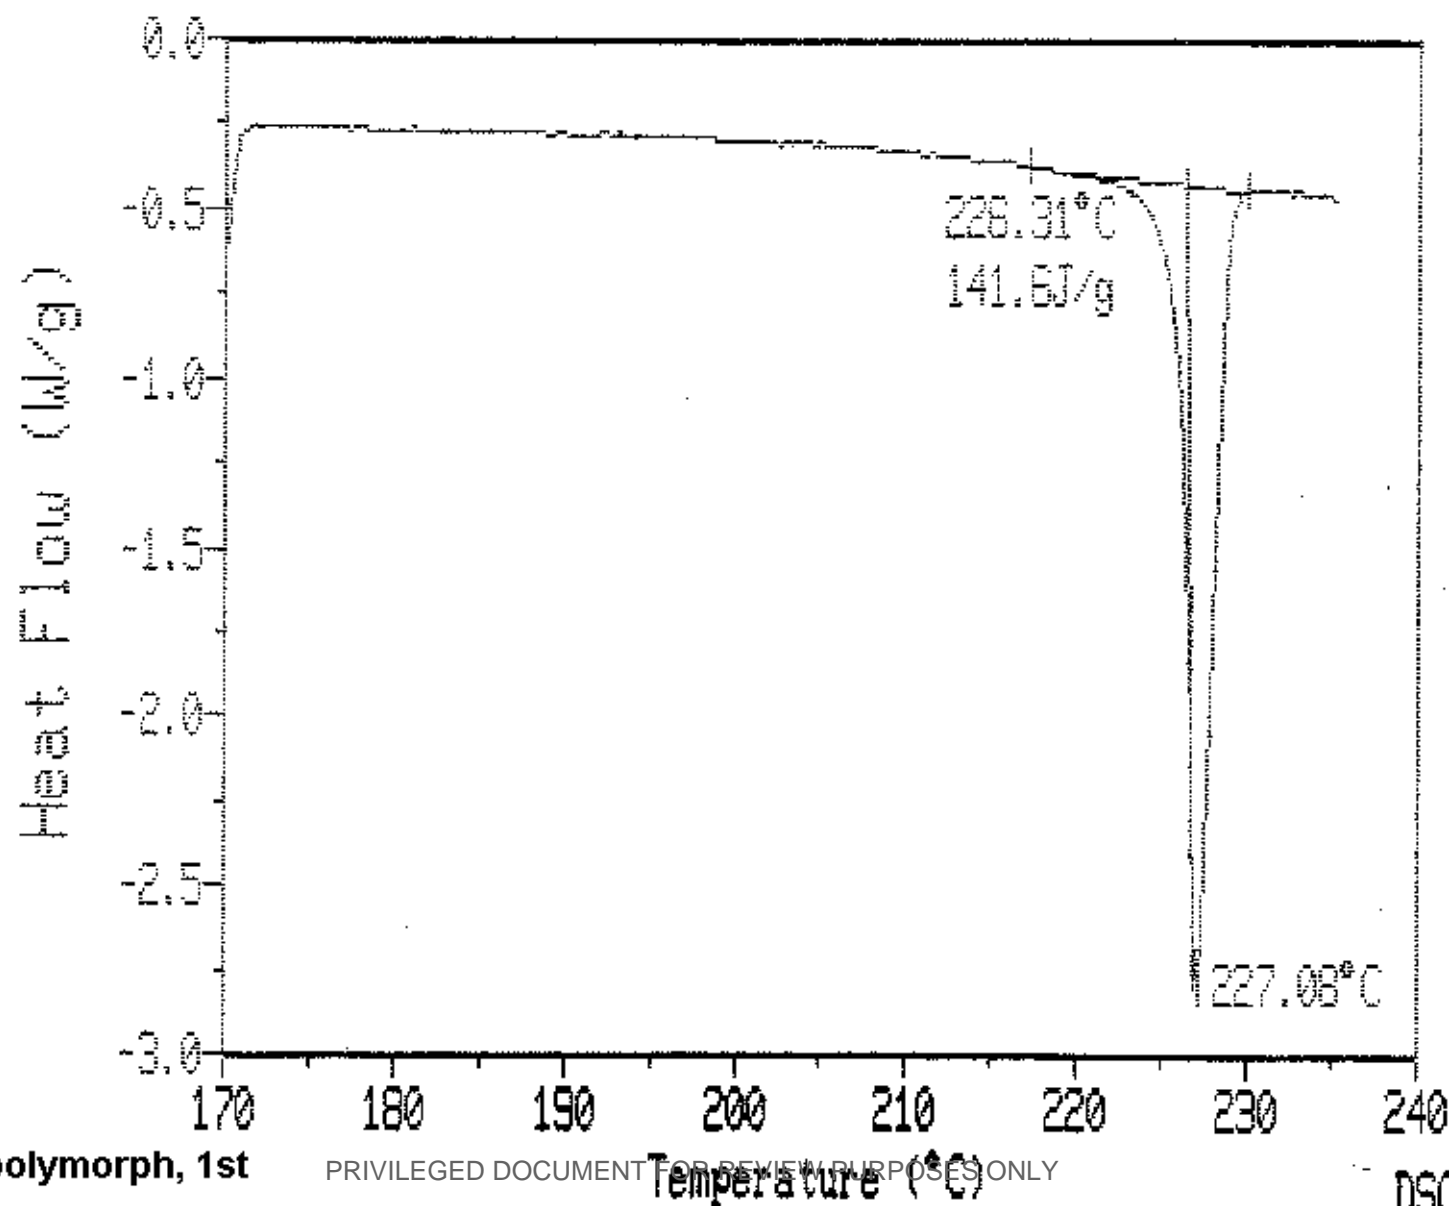

Coumarin 120, 1st polymorph, 1st cycle

PRIVILEGED DOCUMENT FOR REVIEW PURPOSES ONLY

DSC V4.0B

p- permiane (13), (14)  
m = 1.44 mg

Sample: C 120 PD STOPIENIU  
Method: DSC

DSC File: A:DSC.014  
Run Date: 19-Jun-07 13:02

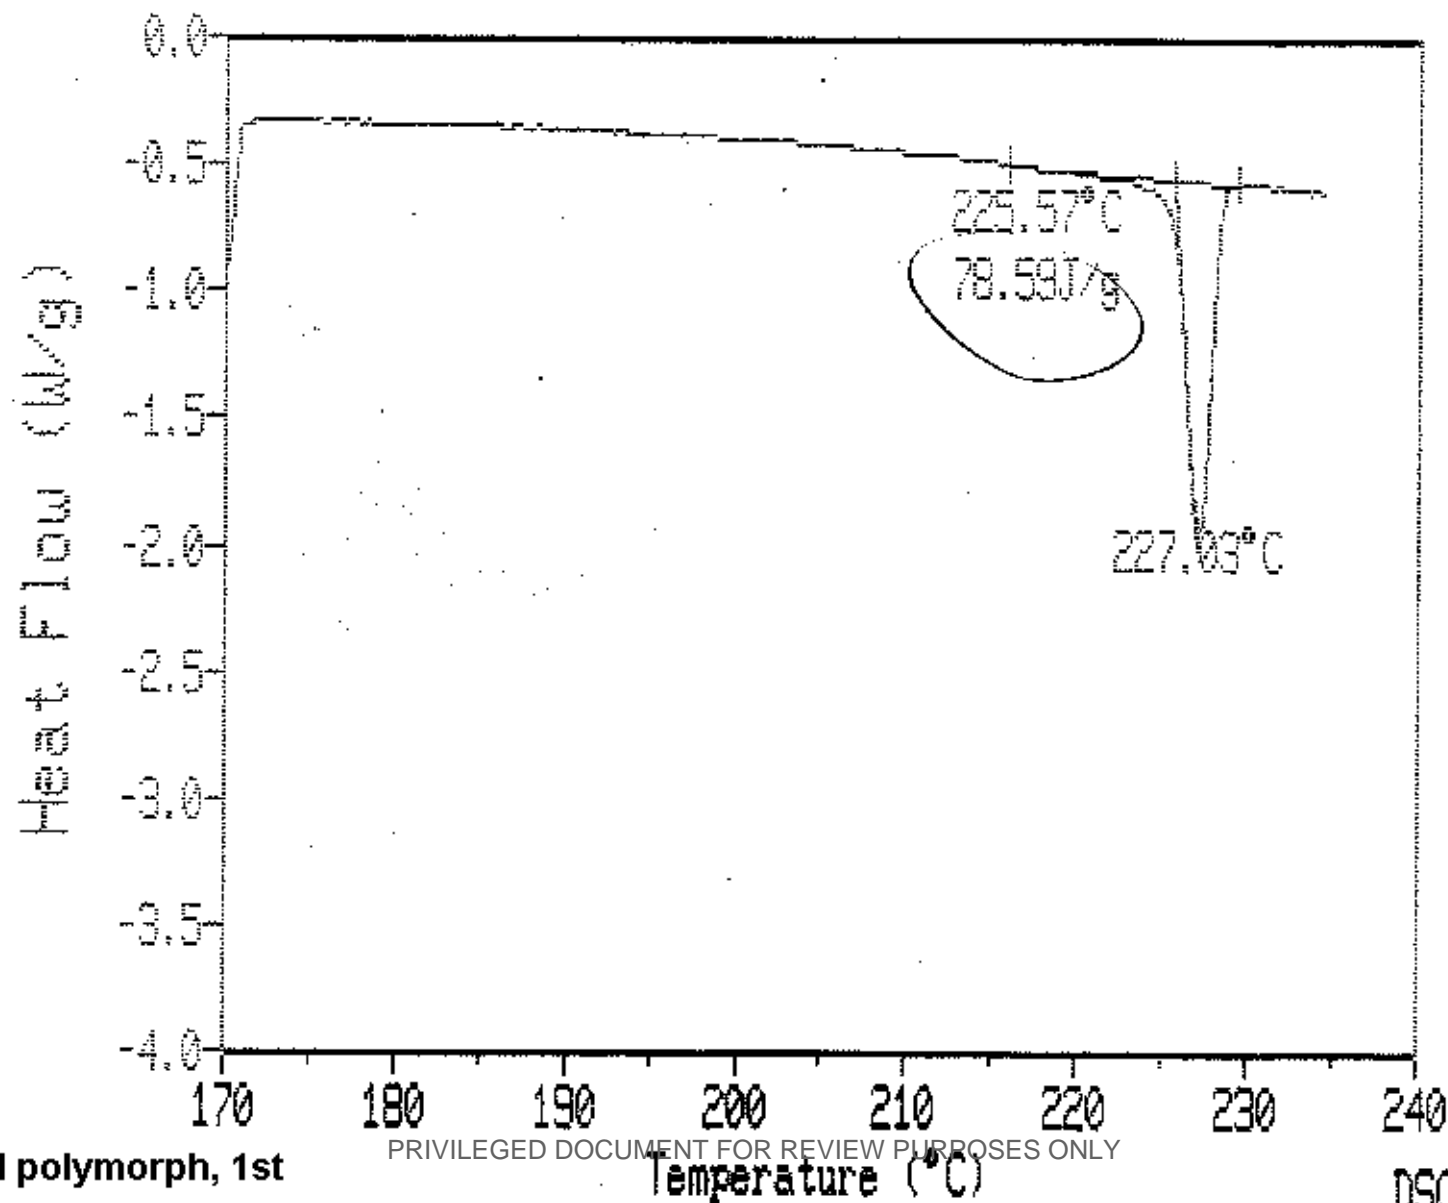

Supplement: b707581b.pdf [file b707581b.pdf]
